# Supplementary material for: Method for Identifying Essential Proteins by Key Features of Proteins in a Novel Protein-Domain Network
Source: Front Genet. 2021 Jun 29;12:708162. doi: 10.3389/fgene.2021.708162 (PMC8276041; doi:10.3389/fgene.2021.708162)
Supplement: Supplementary file 2 [file Table_2.XLSX]

## Sheet: Sheet1
Q0045	PF00115
Q0050	PF00078
Q0050	PF01348
Q0055	PF00078
Q0055	PF00115
Q0055	PF01348
Q0060	PF00115
Q0060	PF00961
Q0065	PF00115
Q0065	PF00961
Q0070	PF00115
Q0070	PF03161
Q0075	PF00961
Q0105	PF13631
Q0110	PF03161
Q0110	PF13631
Q0115	PF00961
Q0115	PF13631
Q0120	PF00961
Q0120	PF13631
Q0130	PF00137
Q0160	PF03161
Q0255	PF00961
YAL004W	PF10712
YAL005C	PF00012
YAL007C	PF01105
YAL012W	PF01053
YAL013W	PF08598
YAL014C	PF05739
YAL015C	PF00730
YAL016W	PF02985
YAL017W	PF00069
YAL019W	PF00176
YAL019W	PF00271
YAL020C	PF00415
YAL021C	PF03372
YAL021C	PF12799
YAL023C	PF02366
YAL023C	PF02815
YAL024C	PF00617
YAL024C	PF00618
YAL026C	PF00122
YAL026C	PF12710
YAL028W	PF13694
YAL029C	PF00063
YAL029C	PF00612
YAL029C	PF01843
YAL030W	PF00957
YAL034C	PF04433
YAL035W	PF00009
YAL035W	PF03144
YAL035W	PF11987
YAL036C	PF01926
YAL036C	PF02824
YAL038W	PF00224
YAL038W	PF02887
YAL039C	PF01265
YAL040C	PF00134
YAL041W	PF00564
YAL041W	PF00621
YAL042W	PF07970
YAL042W	PF13850
YAL044W-A	PF01722
YAL046C	PF01722
YAL049C	PF01738
YAL051W	PF00172
YAL053W	PF06011
YAL054C	PF00501
YAL054C	PF11930
YAL054C	PF13193
YAL056W	PF13418
YAL059W	PF09135
YAL060W	PF00107
YAL060W	PF08240
YAL061W	PF00107
YAL061W	PF08240
YAL062W	PF00208
YAL062W	PF02812
YAL063C	PF00624
YAL063C	PF07691
YAL063C	PF13928
YAL064C-A	PF07691
YAL067C	PF07690
YAL068C	PF00660
YAL068W-A	PF04318
YAR002C-A	PF01105
YAR003W	PF00400
YAR007C	PF01336
YAR008W	PF01974
YAR009C	PF00665
YAR009C	PF07727
YAR010C	PF01021
YAR014C	PF00018
YAR018C	PF00069
YAR019C	PF00069
YAR020C	PF00660
YAR023C	PF00674
YAR027W	PF00674
YAR028W	PF00674
YAR029W	PF00674
YAR031W	PF00674
YAR033W	PF00674
YAR035W	PF00755
YAR042W	PF00023
YAR042W	PF00169
YAR042W	PF01237
YAR050W	PF00624
YAR050W	PF07691
YAR071W	PF00328
YAR073W	PF00478
YAR073W	PF00571
YAR075W	PF00478
YBL002W	PF00125
YBL003C	PF00125
YBL005W	PF00172
YBL005W	PF04082
YBL005W-A	PF01021
YBL005W-B	PF00665
YBL005W-B	PF01021
YBL005W-B	PF07727
YBL007C	PF00018
YBL008W	PF00400
YBL008W	PF07569
YBL009W	PF12330
YBL011W	PF01553
YBL013W	PF00551
YBL016W	PF00069
YBL019W	PF03372
YBL021C	PF00808
YBL022C	PF00004
YBL023C	PF00493
YBL024W	PF01189
YBL026W	PF01423
YBL027W	PF01280
YBL030C	PF00153
YBL032W	PF00013
YBL035C	PF04042
YBL036C	PF01168
YBL037W	PF01602
YBL037W	PF02883
YBL038W	PF00252
YBL039C	PF00117
YBL039C	PF06418
YBL041W	PF00227
YBL042C	PF02133
YBL045C	PF00675
YBL045C	PF05193
YBL047C	PF00627
YBL047C	PF12763
YBL051C	PF14259
YBL052C	PF01853
YBL054W	PF00249
YBL055C	PF01026
YBL056W	PF00481
YBL058W	PF00789
YBL059C-A	PF08583
YBL060W	PF01369
YBL061C	PF08238
YBL063W	PF00225
YBL064C	PF00578
YBL064C	PF10417
YBL066C	PF00172
YBL066C	PF04082
YBL067C	PF00443
YBL068W	PF00156
YBL068W	PF13793
YBL068W-A	PF13602
YBL069W	PF08240
YBL069W	PF13602
YBL071W-A	PF05207
YBL072C	PF01201
YBL075C	PF00012
YBL076C	PF00133
YBL076C	PF08264
YBL079W	PF03177
YBL079W	PF08801
YBL084C	PF00515
YBL084C	PF12895
YBL084C	PF13414
YBL085W	PF00018
YBL085W	PF00169
YBL085W	PF07647
YBL087C	PF00238
YBL088C	PF00454
YBL088C	PF02260
YBL089W	PF01490
YBL091C	PF00557
YBL091C-A	PF00635
YBL098W	PF01494
YBL099W	PF00006
YBL099W	PF00306
YBL099W	PF02874
YBL100W-A	PF01021
YBL100W-B	PF00665
YBL100W-B	PF01021
YBL100W-B	PF07727
YBL100W-B	PF13976
YBL101C	PF02752
YBL102W	PF04178
YBL103C	PF00010
YBL105C	PF00069
YBL105C	PF00168
YBL105C	PF00433
YBL106C	PF08596
YBL111C	PF00270
YBL112C	PF00271
YBR001C	PF01204
YBR001C	PF07492
YBR002C	PF01255
YBR003W	PF00348
YBR005W	PF12273
YBR006W	PF00171
YBR007C	PF08238
YBR008C	PF07690
YBR009C	PF00125
YBR010W	PF00125
YBR011C	PF00719
YBR012W-A	PF01021
YBR012W-B	PF00665
YBR012W-B	PF01021
YBR012W-B	PF07727
YBR014C	PF00462
YBR015C	PF11051
YBR019C	PF01263
YBR019C	PF01370
YBR020W	PF00288
YBR020W	PF08544
YBR020W	PF10509
YBR021W	PF02133
YBR024W	PF02630
YBR025C	PF01926
YBR025C	PF06071
YBR028C	PF00069
YBR028C	PF00433
YBR029C	PF01148
YBR030W	PF00856
YBR031W	PF00573
YBR031W	PF14374
YBR033W	PF00172
YBR034C	PF13847
YBR035C	PF01243
YBR037C	PF02630
YBR038W	PF01644
YBR038W	PF08407
YBR041W	PF00501
YBR042C	PF01553
YBR043C	PF07690
YBR044C	PF00118
YBR046C	PF00107
YBR046C	PF08240
YBR048W	PF00366
YBR049C	PF13921
YBR050C	PF08550
YBR054W	PF01036
YBR058C	PF00443
YBR058C	PF00627
YBR058C	PF02148
YBR059C	PF00069
YBR061C	PF01728
YBR062C	PF13639
YBR066C	PF13465
YBR067C	PF00660
YBR068C	PF00324
YBR069C	PF00324
YBR072W	PF00011
YBR073W	PF00176
YBR073W	PF00271
YBR073W	PF10382
YBR074W	PF04389
YBR080C	PF00004
YBR080C	PF02359
YBR080C	PF02933
YBR081C	PF00439
YBR082C	PF00179
YBR084C-A	PF01280
YBR084W	PF00763
YBR084W	PF01268
YBR084W	PF02882
YBR085W	PF00153
YBR087W	PF08542
YBR089C-A	PF00505
YBR091C	PF02953
YBR092C	PF00328
YBR093C	PF00328
YBR097W	PF00069
YBR102C	PF08700
YBR103W	PF00400
YBR103W	PF08513
YBR104W	PF00153
YBR105C	PF09783
YBR109C	PF13499
YBR110W	PF00534
YBR111C	PF00293
YBR112C	PF00515
YBR112C	PF13414
YBR114W	PF00097
YBR114W	PF00176
YBR114W	PF00271
YBR115C	PF00501
YBR115C	PF00550
YBR117C	PF00456
YBR117C	PF02779
YBR117C	PF02780
YBR118W	PF00009
YBR118W	PF03143
YBR118W	PF03144
YBR119W	PF00076
YBR119W	PF14259
YBR125C	PF00481
YBR126C	PF00982
YBR127C	PF00006
YBR127C	PF00306
YBR127C	PF02874
YBR129C	PF00169
YBR132C	PF00324
YBR136W	PF00454
YBR136W	PF02259
YBR136W	PF02260
YBR139W	PF00450
YBR140C	PF00616
YBR142W	PF00270
YBR142W	PF00271
YBR143C	PF03463
YBR143C	PF03464
YBR143C	PF03465
YBR145W	PF00107
YBR145W	PF08240
YBR146W	PF00380
YBR147W	PF04193
YBR149W	PF00248
YBR150C	PF00172
YBR150C	PF04082
YBR151W	PF06999
YBR155W	PF00515
YBR159W	PF00106
YBR160W	PF00069
YBR161W	PF04488
YBR162C	PF10287
YBR162C	PF10290
YBR164C	PF00025
YBR168W	PF06398
YBR169C	PF00012
YBR172C	PF02213
YBR175W	PF00400
YBR177C	PF00561
YBR179C	PF00350
YBR180W	PF07690
YBR181C	PF01092
YBR182C	PF00319
YBR183W	PF05875
YBR186W	PF00004
YBR189W	PF00163
YBR189W	PF01479
YBR191W	PF01157
YBR192W	PF00153
YBR195C	PF00400
YBR195C	PF12265
YBR198C	PF00400
YBR198C	PF08513
YBR199W	PF01793
YBR200W	PF00018
YBR200W	PF00564
YBR200W	PF00787
YBR201W	PF04511
YBR202W	PF00493
YBR204C	PF00561
YBR205W	PF01793
YBR207W	PF03239
YBR208C	PF00289
YBR208C	PF00364
YBR208C	PF01425
YBR208C	PF02785
YBR208C	PF02786
YBR210W	PF03311
YBR212W	PF00076
YBR214W	PF00571
YBR216C	PF08568
YBR218C	PF00289
YBR218C	PF00364
YBR218C	PF00682
YBR218C	PF02436
YBR218C	PF02785
YBR218C	PF02786
YBR219C	PF13000
YBR220C	PF13000
YBR221C	PF02779
YBR221C	PF02780
YBR222C	PF00501
YBR222C	PF13193
YBR227C	PF07724
YBR227C	PF10431
YBR233W	PF00013
YBR234C	PF00400
YBR235W	PF00324
YBR237W	PF00270
YBR237W	PF00271
YBR239C	PF00172
YBR240C	PF00172
YBR241C	PF00083
YBR242W	PF01966
YBR244W	PF00255
YBR245C	PF00176
YBR245C	PF00271
YBR245C	PF09110
YBR245C	PF09111
YBR248C	PF00117
YBR248C	PF00977
YBR249C	PF00793
YBR250W	PF00339
YBR251W	PF00333
YBR251W	PF03719
YBR254C	PF04628
YBR260C	PF00611
YBR260C	PF00620
YBR263W	PF00464
YBR264C	PF00071
YBR265W	PF00106
YBR267W	PF12756
YBR270C	PF08539
YBR271W	PF10294
YBR273C	PF00789
YBR274W	PF00069
YBR276C	PF00782
YBR280C	PF13540
YBR281C	PF00400
YBR281C	PF01546
YBR281C	PF07687
YBR283C	PF00344
YBR283C	PF10559
YBR284W	PF00962
YBR286W	PF04389
YBR287W	PF03547
YBR288C	PF00928
YBR289W	PF04855
YBR291C	PF00153
YBR293W	PF07690
YBR294W	PF00916
YBR294W	PF01740
YBR294W	PF13792
YBR295W	PF00122
YBR295W	PF00702
YBR297W	PF00172
YBR297W	PF04082
YBR298C	PF00083
YBR299W	PF00128
YBR301W	PF00660
YBR302C	PF00674
YCL001W-B	PF03465
YCL004W	PF00614
YCL011C	PF00076
YCL017C	PF00266
YCL018W	PF00180
YCL019W	PF00665
YCL019W	PF01021
YCL019W	PF07727
YCL019W	PF13976
YCL020W	PF01021
YCL024W	PF00069
YCL025C	PF00324
YCL026C-A	PF00881
YCL026C-B	PF00881
YCL027W	PF00018
YCL029C	PF01302
YCL032W	PF00788
YCL034W	PF03127
YCL035C	PF00462
YCL037C	PF05383
YCL039W	PF00400
YCL040W	PF00349
YCL040W	PF03727
YCL043C	PF00085
YCL043C	PF13848
YCL050C	PF09830
YCL054W	PF01728
YCL055W	PF05063
YCL057W	PF01432
YCL064C	PF00291
YCL066W	PF04769
YCL067C	PF00046
YCL069W	PF07690
YCL073C	PF07690
YCR002C	PF00735
YCR004C	PF00258
YCR005C	PF00285
YCR007C	PF00674
YCR008W	PF00069
YCR009C	PF03114
YCR010C	PF01184
YCR011C	PF00005
YCR011C	PF01061
YCR015C	PF12710
YCR017C	PF03372
YCR017C	PF10277
YCR018C	PF00320
YCR019W	PF00294
YCR020C	PF03070
YCR020C-A	PF01423
YCR021C	PF01036
YCR023C	PF07690
YCR024C	PF00152
YCR024C	PF01336
YCR024C-A	PF08114
YCR026C	PF01663
YCR027C	PF00071
YCR028C	PF07690
YCR031C	PF00411
YCR033W	PF00249
YCR034W	PF01151
YCR035C	PF01138
YCR036W	PF00294
YCR037C	PF03105
YCR038C	PF00617
YCR039C	PF00046
YCR040W	PF04769
YCR045C	PF00082
YCR045C	PF05922
YCR047C	PF08241
YCR048W	PF03062
YCR051W	PF00023
YCR053W	PF00291
YCR057C	PF00400
YCR057C	PF04003
YCR059C	PF01205
YCR059C	PF05773
YCR060W	PF13414
YCR061W	PF10355
YCR065W	PF00250
YCR066W	PF00097
YCR066W	PF02037
YCR067C	PF00400
YCR068W	PF01764
YCR069W	PF00160
YCR072C	PF00400
YCR072C	PF08154
YCR073C	PF00069
YCR073W-A	PF01182
YCR075C	PF04193
YCR075W-A	PF11503
YCR079W	PF00481
YCR083W	PF00085
YCR084C	PF00400
YCR088W	PF00018
YCR088W	PF00241
YCR089W	PF13928
YCR091W	PF00069
YCR092C	PF00488
YCR092C	PF01624
YCR092C	PF05188
YCR092C	PF05190
YCR092C	PF05192
YCR094W	PF03381
YCR095C	PF03162
YCR096C	PF00046
YCR097W	PF00046
YCR098C	PF00083
YCR102C	PF00107
YCR102W-A	PF00674
YCR104W	PF00660
YCR105W	PF00107
YCR105W	PF08240
YCR106W	PF00172
YCR107W	PF00248
YDL001W	PF02582
YDL002C	PF00505
YDL003W	PF04825
YDL006W	PF00481
YDL007W	PF00004
YDL008W	PF12678
YDL010W	PF00462
YDL012C	PF12734
YDL015C	PF02544
YDL017W	PF00069
YDL018C	PF01105
YDL019C	PF00023
YDL019C	PF00169
YDL019C	PF01237
YDL021W	PF00300
YDL022W	PF01210
YDL022W	PF07479
YDL024C	PF00328
YDL025C	PF00069
YDL028C	PF00069
YDL029W	PF00022
YDL030W	PF12171
YDL031W	PF00270
YDL031W	PF00271
YDL036C	PF00849
YDL037C	PF10182
YDL040C	PF07719
YDL042C	PF02146
YDL042C	PF04574
YDL043C	PF12874
YDL045C	PF01507
YDL045W-A	PF06747
YDL047W	PF00149
YDL049C	PF05390
YDL049C	PF10342
YDL051W	PF00076
YDL051W	PF05383
YDL052C	PF01553
YDL054C	PF07690
YDL055C	PF00132
YDL055C	PF00483
YDL056W	PF00023
YDL056W	PF04383
YDL057W	PF12695
YDL059C	PF04098
YDL060W	PF04950
YDL060W	PF08142
YDL061C	PF00253
YDL064W	PF00179
YDL066W	PF00180
YDL070W	PF00439
YDL072C	PF05529
YDL074C	PF13923
YDL075W	PF01198
YDL077C	PF10367
YDL078C	PF00056
YDL078C	PF02866
YDL079C	PF00069
YDL080C	PF00205
YDL080C	PF02775
YDL080C	PF02776
YDL081C	PF00428
YDL082W	PF01294
YDL083C	PF00380
YDL084W	PF00270
YDL084W	PF00271
YDL085W	PF00070
YDL085W	PF07992
YDL086W	PF01738
YDL088C	PF05172
YDL090C	PF00432
YDL091C	PF00789
YDL093W	PF02366
YDL093W	PF02815
YDL095W	PF02366
YDL095W	PF02815
YDL097C	PF01399
YDL098C	PF12874
YDL101C	PF00069
YDL101C	PF00498
YDL102W	PF00136
YDL102W	PF03104
YDL102W	PF14260
YDL103C	PF01704
YDL104C	PF00814
YDL106C	PF00046
YDL108W	PF00069
YDL109C	PF05057
YDL111C	PF01138
YDL112W	PF00588
YDL113C	PF00787
YDL114W	PF00106
YDL119C	PF00153
YDL122W	PF00443
YDL123W	PF01679
YDL124W	PF00248
YDL125C	PF01230
YDL126C	PF00004
YDL126C	PF02359
YDL126C	PF02933
YDL127W	PF00134
YDL128W	PF01699
YDL130W	PF00428
YDL130W-A	PF04568
YDL131W	PF00682
YDL132W	PF00888
YDL132W	PF10557
YDL133C-A	PF05162
YDL134C	PF00149
YDL136W	PF00831
YDL137W	PF00025
YDL138W	PF00083
YDL140C	PF00623
YDL140C	PF04983
YDL140C	PF04997
YDL140C	PF04998
YDL140C	PF05000
YDL141W	PF03099
YDL142C	PF01066
YDL143W	PF00118
YDL144C	PF02558
YDL144C	PF08546
YDL145C	PF00400
YDL145C	PF04053
YDL147W	PF01399
YDL153C	PF04000
YDL154W	PF00488
YDL154W	PF05192
YDL155W	PF00134
YDL155W	PF02984
YDL156W	PF00400
YDL159W	PF00069
YDL160C	PF00270
YDL160C	PF00271
YDL161W	PF01417
YDL164C	PF01068
YDL164C	PF04675
YDL165W	PF04153
YDL166C	PF13238
YDL168W	PF00107
YDL168W	PF08240
YDL170W	PF00172
YDL170W	PF11951
YDL171C	PF00310
YDL171C	PF07992
YDL174C	PF01565
YDL174C	PF02913
YDL175C	PF00098
YDL177C	PF01205
YDL178W	PF01565
YDL178W	PF02913
YDL179W	PF00134
YDL181W	PF04568
YDL182W	PF00682
YDL184C	PF05162
YDL185W	PF00006
YDL185W	PF00306
YDL185W	PF02874
YDL185W	PF05203
YDL185W	PF05204
YDL188C	PF00149
YDL189W	PF01424
YDL191W	PF00831
YDL192W	PF00025
YDL194W	PF00083
YDL195W	PF00400
YDL198C	PF00153
YDL199C	PF00083
YDL202W	PF00466
YDL203C	PF08238
YDL204W	PF02453
YDL206W	PF01699
YDL208W	PF01248
YDL209C	PF00076
YDL210W	PF13520
YDL214C	PF00069
YDL215C	PF00208
YDL216C	PF01398
YDL217C	PF02466
YDL218W	PF01284
YDL222C	PF06687
YDL224C	PF00076
YDL225W	PF00735
YDL226C	PF01412
YDL227C	PF05203
YDL227C	PF05204
YDL228C	PF10712
YDL229W	PF00012
YDL230W	PF00102
YDL231C	PF13515
YDL234C	PF00566
YDL236W	PF00702
YDL238C	PF01979
YDL239C	PF11778
YDL240W	PF00412
YDL240W	PF00620
YDL243C	PF00248
YDL244W	PF09084
YDL245C	PF00083
YDL246C	PF00107
YDL246C	PF08240
YDL247W	PF00083
YDL248W	PF00674
YDR001C	PF01204
YDR001C	PF07492
YDR002W	PF00638
YDR003W	PF12273
YDR004W	PF08423
YDR009W	PF00288
YDR009W	PF08544
YDR009W	PF10509
YDR011W	PF00005
YDR011W	PF01061
YDR011W	PF06422
YDR012W	PF00573
YDR012W	PF14374
YDR013W	PF05916
YDR017C	PF03770
YDR018C	PF01553
YDR020C	PF00485
YDR021W	PF00270
YDR021W	PF00271
YDR023W	PF00587
YDR025W	PF00366
YDR026C	PF00249
YDR028C	PF08550
YDR030C	PF00400
YDR031W	PF06747
YDR032C	PF00258
YDR033W	PF01036
YDR034C	PF00172
YDR034C	PF11951
YDR034C-C	PF01021
YDR034C-D	PF00665
YDR034C-D	PF01021
YDR034C-D	PF07727
YDR034C-D	PF13976
YDR034W-B	PF12734
YDR035W	PF00793
YDR036C	PF00378
YDR037W	PF00152
YDR037W	PF01336
YDR038C	PF00122
YDR038C	PF00689
YDR038C	PF00690
YDR038C	PF00702
YDR039C	PF00122
YDR039C	PF00689
YDR039C	PF00690
YDR039C	PF00702
YDR040C	PF00122
YDR040C	PF00689
YDR040C	PF00690
YDR040C	PF00702
YDR041W	PF00338
YDR043C	PF13465
YDR045C	PF01096
YDR045C	PF02150
YDR046C	PF00324
YDR051C	PF00300
YDR054C	PF00179
YDR057W	PF07915
YDR058C	PF07819
YDR059C	PF00179
YDR060W	PF03914
YDR061W	PF00005
YDR062W	PF00155
YDR063W	PF00241
YDR064W	PF00312
YDR066C	PF04181
YDR067C	PF03162
YDR068W	PF03909
YDR069C	PF00443
YDR071C	PF00583
YDR072C	PF01569
YDR074W	PF00982
YDR074W	PF02358
YDR075W	PF00149
YDR080W	PF00400
YDR080W	PF00637
YDR090C	PF04193
YDR091C	PF00005
YDR091C	PF04068
YDR092W	PF00179
YDR093W	PF00122
YDR093W	PF12710
YDR096W	PF02373
YDR096W	PF02375
YDR096W	PF13465
YDR097C	PF00488
YDR097C	PF01624
YDR097C	PF05188
YDR097C	PF05190
YDR097C	PF05192
YDR098C	PF00085
YDR098C	PF00462
YDR098C-A	PF01021
YDR098C-B	PF00665
YDR098C-B	PF01021
YDR098C-B	PF07727
YDR099W	PF00244
YDR101C	PF00557
YDR106W	PF00022
YDR107C	PF02990
YDR109C	PF00370
YDR109C	PF02782
YDR111C	PF00155
YDR116C	PF00687
YDR117C	PF01253
YDR117C	PF02201
YDR119W	PF07690
YDR122W	PF00069
YDR122W	PF02149
YDR125C	PF12697
YDR126W	PF01529
YDR128W	PF00400
YDR129C	PF00307
YDR135C	PF00005
YDR135C	PF00664
YDR139C	PF00240
YDR142C	PF00400
YDR143C	PF13639
YDR144C	PF00026
YDR146C	PF00096
YDR147W	PF01633
YDR147W	PF04428
YDR148C	PF00198
YDR148C	PF00364
YDR151C	PF00642
YDR152W	PF05773
YDR153C	PF01417
YDR155C	PF00160
YDR158W	PF01118
YDR158W	PF02774
YDR159W	PF03399
YDR160W	PF00324
YDR162C	PF00018
YDR164C	PF00995
YDR165W	PF00400
YDR170C	PF01369
YDR170C	PF12783
YDR170W-A	PF01021
YDR171W	PF00011
YDR172W	PF00009
YDR172W	PF03143
YDR172W	PF03144
YDR173C	PF03770
YDR174W	PF00505
YDR177W	PF00179
YDR178W	PF05328
YDR179W-A	PF02194
YDR182W	PF00149
YDR182W-A	PF13593
YDR185C	PF04707
YDR188W	PF00118
YDR189W	PF00995
YDR190C	PF06068
YDR191W	PF02146
YDR194C	PF00270
YDR194C	PF00271
YDR197W	PF08546
YDR200C	PF00498
YDR205W	PF01545
YDR206W	PF10373
YDR206W	PF10374
YDR207C	PF00172
YDR208W	PF01504
YDR210C-C	PF01021
YDR210C-D	PF00665
YDR210C-D	PF01021
YDR210C-D	PF07727
YDR210W	PF12734
YDR210W-A	PF01021
YDR210W-B	PF00665
YDR210W-B	PF01021
YDR210W-B	PF07727
YDR210W-B	PF13976
YDR211W	PF00132
YDR211W	PF00483
YDR211W	PF02020
YDR212W	PF00118
YDR213W	PF00172
YDR213W	PF11951
YDR214W	PF09229
YDR216W	PF00096
YDR217C	PF00533
YDR218C	PF00735
YDR219C	PF00646
YDR221W	PF07915
YDR222W	PF08622
YDR223W	PF10380
YDR224C	PF00125
YDR225W	PF00125
YDR226W	PF00406
YDR226W	PF05191
YDR232W	PF00155
YDR233C	PF02453
YDR234W	PF00330
YDR234W	PF00694
YDR237W	PF00281
YDR237W	PF00673
YDR238C	PF01602
YDR242W	PF01425
YDR243C	PF00270
YDR243C	PF00271
YDR244W	PF00515
YDR244W	PF13181
YDR245W	PF05637
YDR246W	PF04099
YDR247W	PF00069
YDR248C	PF13238
YDR251W	PF08546
YDR252W	PF01849
YDR253C	PF00096
YDR253C	PF13894
YDR255C	PF10607
YDR255C	PF13445
YDR256C	PF00199
YDR256C	PF06628
YDR257C	PF00856
YDR258C	PF00004
YDR258C	PF07724
YDR258C	PF10431
YDR259C	PF00170
YDR261C	PF00150
YDR261C-C	PF01021
YDR261C-D	PF00665
YDR261C-D	PF01021
YDR261C-D	PF07727
YDR261W-A	PF01021
YDR261W-B	PF00665
YDR261W-B	PF01021
YDR261W-B	PF07727
YDR261W-B	PF13976
YDR263C	PF00752
YDR263C	PF00867
YDR264C	PF00023
YDR264C	PF01529
YDR265W	PF04757
YDR265W	PF13923
YDR266C	PF13920
YDR267C	PF00400
YDR268W	PF00579
YDR270W	PF00122
YDR270W	PF00403
YDR270W	PF00702
YDR272W	PF00753
YDR273W	PF02845
YDR276C	PF01679
YDR280W	PF01138
YDR280W	PF03725
YDR282C	PF02582
YDR283C	PF00069
YDR283C	PF05773
YDR284C	PF01569
YDR287W	PF00459
YDR291W	PF00270
YDR291W	PF00271
YDR292C	PF00448
YDR292C	PF02881
YDR293C	PF00773
YDR294C	PF00282
YDR295C	PF11496
YDR297W	PF04116
YDR300C	PF00696
YDR300C	PF01472
YDR301W	PF03178
YDR303C	PF00172
YDR304C	PF00160
YDR307W	PF02366
YDR307W	PF02815
YDR309C	PF00786
YDR311W	PF03909
YDR312W	PF04427
YDR313C	PF01363
YDR313C	PF13639
YDR314C	PF10403
YDR314C	PF10404
YDR314C	PF10405
YDR316W	PF08242
YDR316W-A	PF01021
YDR316W-B	PF00665
YDR316W-B	PF01021
YDR316W-B	PF07727
YDR319C	PF10261
YDR321W	PF00710
YDR322W	PF01161
YDR323C	PF01363
YDR324C	PF00400
YDR326C	PF02893
YDR328C	PF03931
YDR330W	PF00789
YDR332W	PF00271
YDR332W	PF04851
YDR334W	PF00176
YDR334W	PF00271
YDR334W	PF07529
YDR336W	PF01926
YDR337W	PF00312
YDR338C	PF01554
YDR339C	PF04900
YDR341C	PF00750
YDR341C	PF03485
YDR341C	PF05746
YDR342C	PF00083
YDR343C	PF00083
YDR345C	PF00083
YDR346C	PF08622
YDR348C	PF08316
YDR349C	PF00026
YDR352W	PF04193
YDR353W	PF00070
YDR353W	PF07992
YDR358W	PF00790
YDR358W	PF02883
YDR358W	PF03127
YDR359C	PF07529
YDR359C	PF13921
YDR364C	PF00400
YDR365C	PF08159
YDR365W-A	PF01021
YDR365W-B	PF00665
YDR365W-B	PF01021
YDR365W-B	PF07727
YDR368W	PF00248
YDR369C	PF00498
YDR370C	PF08652
YDR373W	PF00036
YDR375C	PF00004
YDR378C	PF01423
YDR379C-A	PF05347
YDR379W	PF00412
YDR379W	PF00620
YDR380W	PF00205
YDR380W	PF02775
YDR380W	PF02776
YDR381W	PF00076
YDR382W	PF00428
YDR384C	PF01184
YDR385W	PF00009
YDR385W	PF00679
YDR385W	PF03144
YDR385W	PF03764
YDR387C	PF00083
YDR388W	PF00018
YDR388W	PF03114
YDR389W	PF00620
YDR390C	PF00899
YDR390C	PF02134
YDR390C	PF10585
YDR392W	PF02269
YDR394W	PF00004
YDR395W	PF03810
YDR395W	PF08506
YDR397C	PF00808
YDR398W	PF04003
YDR399W	PF00156
YDR402C	PF00067
YDR404C	PF00575
YDR404C	PF03876
YDR405W	PF00276
YDR406W	PF00005
YDR406W	PF01061
YDR406W	PF06422
YDR408C	PF00551
YDR409W	PF02037
YDR409W	PF02891
YDR409W	PF14324
YDR411C	PF04511
YDR414C	PF03124
YDR415C	PF04389
YDR418W	PF00298
YDR418W	PF03946
YDR419W	PF00817
YDR419W	PF11799
YDR421W	PF00172
YDR422C	PF04739
YDR423C	PF00170
YDR423C	PF08601
YDR425W	PF00787
YDR427W	PF01399
YDR429C	PF00076
YDR430C	PF00675
YDR430C	PF05193
YDR432W	PF00076
YDR435C	PF04072
YDR436W	PF00149
YDR438W	PF00892
YDR441C	PF00156
YDR444W	PF05057
YDR447C	PF00833
YDR448W	PF00249
YDR448W	PF00569
YDR448W	PF04433
YDR450W	PF00416
YDR451C	PF00046
YDR452W	PF00149
YDR453C	PF00578
YDR453C	PF10417
YDR456W	PF00999
YDR457W	PF00632
YDR458C	PF09402
YDR458C	PF12949
YDR459C	PF01529
YDR463W	PF00096
YDR466W	PF00069
YDR468C	PF05739
YDR471W	PF01777
YDR472W	PF04051
YDR477W	PF00069
YDR478W	PF04032
YDR479C	PF06398
YDR483W	PF01793
YDR485C	PF08265
YDR486C	PF03357
YDR488C	PF00400
YDR489W	PF05916
YDR490C	PF00069
YDR492W	PF03006
YDR497C	PF00083
YDR500C	PF01907
YDR501W	PF00498
YDR502C	PF00438
YDR502C	PF02772
YDR502C	PF02773
YDR503C	PF01569
YDR505C	PF04468
YDR506C	PF00394
YDR506C	PF07731
YDR506C	PF07732
YDR507C	PF00069
YDR508C	PF00324
YDR510W	PF00240
YDR511W	PF05347
YDR513W	PF00462
YDR515W	PF05383
YDR516C	PF00349
YDR516C	PF03727
YDR518W	PF00085
YDR518W	PF13848
YDR519W	PF00254
YDR520C	PF00172
YDR523C	PF00069
YDR524C	PF01412
YDR525W-A	PF01679
YDR530C	PF09830
YDR533C	PF01965
YDR536W	PF00083
YDR538W	PF02441
YDR541C	PF01370
YDR542W	PF00660
YDR543C	PF04318
YDR545W	PF00270
YDR545W	PF00271
YEL003W	PF01920
YEL004W	PF08449
YEL006W	PF00153
YEL007W	PF09729
YEL009C	PF00170
YEL011W	PF00128
YEL012W	PF00179
YEL013W	PF00514
YEL015W	PF03853
YEL015W	PF09532
YEL016C	PF01663
YEL017C-A	PF08114
YEL019C	PF11789
YEL020C	PF00205
YEL020C	PF02775
YEL020C	PF02776
YEL020W-A	PF02953
YEL022W	PF01369
YEL022W	PF12783
YEL026W	PF01248
YEL027W	PF00137
YEL029C	PF08543
YEL030W	PF00012
YEL031W	PF00122
YEL031W	PF12710
YEL032W	PF00493
YEL034W	PF00467
YEL034W	PF01287
YEL036C	PF03452
YEL037C	PF00240
YEL037C	PF00627
YEL039C	PF00034
YEL040W	PF00722
YEL041W	PF01513
YEL042W	PF01150
YEL044W	PF08265
YEL047C	PF00890
YEL048C	PF04628
YEL049W	PF00660
YEL050C	PF00181
YEL050C	PF03947
YEL054C	PF00298
YEL054C	PF03946
YEL056W	PF00400
YEL056W	PF12265
YEL058W	PF00408
YEL058W	PF02878
YEL058W	PF02879
YEL060C	PF00082
YEL060C	PF05922
YEL061C	PF00225
YEL063C	PF00324
YEL064C	PF01490
YEL066W	PF00583
YEL069C	PF00083
YEL070W	PF01232
YEL070W	PF08125
YEL071W	PF01565
YEL071W	PF02913
YEL074W	PF04318
YEL077C	PF00270
YEL077C	PF00271
YER001W	PF11051
YER004W	PF13460
YER005W	PF01150
YER006W	PF01926
YER007C-A	PF01472
YER007W	PF00560
YER007W	PF01302
YER009W	PF02136
YER011W	PF00399
YER011W	PF00660
YER012W	PF00227
YER013W	PF00271
YER013W	PF00575
YER013W	PF04408
YER013W	PF07717
YER015W	PF00501
YER016W	PF00307
YER017C	PF00004
YER017C	PF01434
YER017C	PF06480
YER019C-A	PF03911
YER019W	PF03372
YER020W	PF00503
YER021W	PF01399
YER024W	PF00755
YER025W	PF00009
YER025W	PF03144
YER026C	PF01066
YER027C	PF04739
YER028C	PF00096
YER029C	PF01423
YER031C	PF00071
YER036C	PF00005
YER036C	PF12848
YER038C	PF08691
YER039C	PF08449
YER040W	PF00320
YER041W	PF00867
YER045C	PF00170
YER047C	PF00004
YER048C	PF00226
YER048C	PF14308
YER048W-A	PF05347
YER052C	PF00696
YER053C	PF00153
YER054C	PF03370
YER056C	PF02133
YER056C-A	PF01199
YER057C	PF01042
YER059W	PF08613
YER060W	PF02133
YER060W-A	PF02133
YER061C	PF00109
YER061C	PF02801
YER062C	PF13419
YER063W	PF02037
YER064C	PF04001
YER065C	PF00463
YER066W	PF00400
YER067W	PF10843
YER068W	PF13893
YER069W	PF00696
YER069W	PF01118
YER069W	PF02774
YER069W	PF04768
YER070W	PF00317
YER070W	PF02867
YER070W	PF03477
YER072W	PF02656
YER073W	PF00171
YER074W	PF01282
YER075C	PF00102
YER075C	PF00581
YER078C	PF00557
YER078C	PF05195
YER081W	PF00389
YER081W	PF02826
YER082C	PF00400
YER086W	PF00291
YER087C-B	PF03911
YER087W	PF00587
YER088C	PF00249
YER089C	PF00481
YER090W	PF00425
YER090W	PF04715
YER094C	PF00227
YER095W	PF08423
YER096W	PF08238
YER098W	PF00443
YER099C	PF00156
YER099C	PF13793
YER100W	PF00179
YER101C	PF08240
YER101C	PF13602
YER102W	PF01201
YER103W	PF00012
YER105C	PF03177
YER105C	PF08801
YER107C	PF00400
YER109C	PF08513
YER110C	PF03810
YER111C	PF00023
YER111C	PF04383
YER112W	PF01423
YER113C	PF02990
YER114C	PF00018
YER114C	PF00169
YER114C	PF07647
YER116C	PF00097
YER117W	PF00238
YER118C	PF00018
YER119C	PF01490
YER120W	PF00635
YER122C	PF01412
YER123W	PF00069
YER125W	PF00168
YER125W	PF00397
YER125W	PF00632
YER126C	PF01201
YER127W	PF04000
YER129W	PF00069
YER130C	PF00096
YER131W	PF01283
YER132C	PF13964
YER133W	PF00149
YER136W	PF00996
YER137C-A	PF01021
YER138C	PF00665
YER138C	PF01021
YER138C	PF07727
YER139C	PF04181
YER142C	PF00730
YER143W	PF00627
YER144C	PF00443
YER144C	PF00581
YER145C	PF03239
YER146W	PF01423
YER151C	PF00443
YER152C	PF00155
YER154W	PF02096
YER155C	PF00617
YER155C	PF00618
YER155C	PF00620
YER159C	PF00808
YER159C-A	PF01021
YER160C	PF00665
YER160C	PF01021
YER160C	PF07727
YER162C	PF03835
YER162C	PF10403
YER162C	PF10404
YER162C	PF10405
YER164W	PF00176
YER164W	PF00271
YER164W	PF00385
YER165W	PF00076
YER166W	PF00122
YER169W	PF00096
YER169W	PF02373
YER169W	PF02375
YER169W	PF13894
YER170W	PF00406
YER170W	PF05191
YER171W	PF06733
YER171W	PF13307
YER172C	PF00270
YER172C	PF00271
YER172C	PF02889
YER174C	PF00085
YER174C	PF00462
YER175C	PF13847
YER176W	PF13086
YER176W	PF13087
YER177W	PF00244
YER178W	PF00676
YER179W	PF08423
YER184C	PF00172
YER184C	PF04082
YER185W	PF04479
YER188C-A	PF04318
YER190W	PF00270
YER190W	PF00271
YFL001W	PF01416
YFL002C	PF00270
YFL002C	PF00271
YFL002C	PF13959
YFL002W-A	PF00665
YFL002W-A	PF01021
YFL002W-A	PF07727
YFL002W-A	PF13976
YFL002W-B	PF01021
YFL003C	PF00488
YFL003C	PF05188
YFL003C	PF05190
YFL003C	PF05192
YFL004W	PF02656
YFL004W	PF03105
YFL004W	PF09359
YFL005W	PF00071
YFL008W	PF02463
YFL008W	PF06470
YFL009W	PF00400
YFL009W	PF00646
YFL010C	PF00397
YFL011W	PF00083
YFL016C	PF00226
YFL016C	PF00684
YFL016C	PF01556
YFL017C	PF00583
YFL017W-A	PF01423
YFL018C	PF00070
YFL018C	PF02852
YFL018C	PF07992
YFL020C	PF00660
YFL021W	PF00320
YFL021W	PF08550
YFL022C	PF01409
YFL023W	PF02996
YFL024C	PF10513
YFL025C	PF07819
YFL027C	PF00566
YFL028C	PF00005
YFL029C	PF00069
YFL030W	PF00266
YFL031W	PF07716
YFL033C	PF00069
YFL033C	PF00072
YFL034C-A	PF01776
YFL034C-B	PF03637
YFL037W	PF00091
YFL037W	PF03953
YFL038C	PF00071
YFL039C	PF00022
YFL040W	PF00083
YFL041W	PF00394
YFL041W	PF07731
YFL041W	PF07732
YFL042C	PF02893
YFL044C	PF02338
YFL046W	PF07798
YFL047W	PF00610
YFL047W	PF00611
YFL047W	PF00620
YFL048C	PF03388
YFL049W	PF08624
YFL050C	PF01544
YFL051C	PF07691
YFL052W	PF00172
YFL052W	PF04082
YFL053W	PF02733
YFL053W	PF02734
YFL054C	PF00230
YFL055W	PF00324
YFL056C	PF00248
YFL057C	PF00248
YFL058W	PF09084
YFL059W	PF01680
YFL060C	PF01174
YFL061W	PF01966
YFL062W	PF00674
YFL063W	PF04318
YFL066C	PF00270
YFL066C	PF00271
YFR004W	PF01398
YFR004W	PF13012
YFR005C	PF00443
YFR005C	PF02148
YFR006W	PF00557
YFR006W	PF05195
YFR009W	PF00005
YFR009W	PF12848
YFR010W	PF00443
YFR012W	PF06687
YFR014C	PF00069
YFR015C	PF05693
YFR018C	PF04389
YFR019W	PF00118
YFR019W	PF01363
YFR019W	PF01504
YFR021W	PF00400
YFR022W	PF00339
YFR022W	PF02752
YFR023W	PF00076
YFR023W	PF13893
YFR024C-A	PF00018
YFR024C-A	PF04366
YFR028C	PF00782
YFR030W	PF00175
YFR030W	PF00667
YFR031C	PF02463
YFR031C	PF06470
YFR031C-A	PF00181
YFR031C-A	PF03947
YFR032C	PF14259
YFR034C	PF00010
YFR037C	PF00249
YFR037C	PF00569
YFR037C	PF04433
YFR038W	PF00176
YFR038W	PF00271
YFR040W	PF04499
YFR041C	PF00226
YFR044C	PF01546
YFR044C	PF07687
YFR045W	PF00153
YFR048W	PF02582
YFR050C	PF00227
YFR051C	PF00928
YFR051C	PF01217
YFR052W	PF03399
YFR053C	PF00349
YFR053C	PF03727
YFR055W	PF01053
YGL002W	PF01105
YGL003C	PF00400
YGL004C	PF00400
YGL006W	PF00122
YGL006W	PF00689
YGL006W	PF00690
YGL006W	PF00702
YGL008C	PF00122
YGL008C	PF00690
YGL008C	PF00702
YGL009C	PF00330
YGL009C	PF00694
YGL011C	PF00227
YGL011C	PF10584
YGL012W	PF01222
YGL013C	PF00172
YGL013C	PF04082
YGL014W	PF00806
YGL018C	PF00226
YGL019W	PF01214
YGL021W	PF12330
YGL023C	PF01363
YGL026C	PF00291
YGL030W	PF01248
YGL031C	PF01246
YGL035C	PF13465
YGL038C	PF04488
YGL039W	PF01370
YGL043W	PF01096
YGL043W	PF07500
YGL043W	PF08711
YGL044C	PF00076
YGL045W	PF00339
YGL045W	PF02752
YGL048C	PF00004
YGL049C	PF02854
YGL049C	PF12152
YGL051W	PF00674
YGL053W	PF00674
YGL054C	PF03311
YGL055W	PF00173
YGL056C	PF00571
YGL058W	PF00179
YGL059W	PF10436
YGL060W	PF08568
YGL062W	PF00289
YGL062W	PF00364
YGL062W	PF00682
YGL062W	PF02436
YGL062W	PF02785
YGL062W	PF02786
YGL063W	PF01416
YGL064C	PF00270
YGL064C	PF00271
YGL065C	PF00534
YGL067W	PF00293
YGL070C	PF01096
YGL070C	PF02150
YGL071W	PF08731
YGL073W	PF00447
YGL076C	PF00327
YGL076C	PF08079
YGL077C	PF13520
YGL078C	PF00270
YGL078C	PF00271
YGL080W	PF03650
YGL081W	PF00498
YGL082W	PF04424
YGL083W	PF00069
YGL084C	PF03062
YGL087C	PF00179
YGL089C	PF04648
YGL089C	PF05436
YGL090W	PF09302
YGL091C	PF10609
YGL092W	PF04096
YGL092W	PF13634
YGL094C	PF00929
YGL095C	PF00995
YGL096W	PF05920
YGL097W	PF00415
YGL097W	PF13540
YGL099W	PF01926
YGL100W	PF00400
YGL101W	PF01966
YGL103W	PF00828
YGL104C	PF00083
YGL110C	PF02845
YGL114W	PF03169
YGL115W	PF00571
YGL116W	PF00400
YGL119W	PF03109
YGL120C	PF00270
YGL120C	PF00271
YGL120C	PF04408
YGL120C	PF07717
YGL123W	PF00333
YGL123W	PF03719
YGL125W	PF02219
YGL126W	PF10261
YGL128C	PF00226
YGL131C	PF00628
YGL131C	PF01426
YGL131C	PF13832
YGL133W	PF02791
YGL133W	PF10537
YGL134W	PF08613
YGL135W	PF00687
YGL136C	PF01728
YGL137W	PF00400
YGL137W	PF04053
YGL139W	PF06011
YGL140C	PF13515
YGL141W	PF00632
YGL142C	PF03901
YGL143C	PF00472
YGL144C	PF05057
YGL146C	PF01105
YGL147C	PF00347
YGL150C	PF00176
YGL150C	PF00271
YGL154C	PF01648
YGL155W	PF00432
YGL157W	PF01370
YGL158W	PF00069
YGL160W	PF01794
YGL160W	PF08022
YGL160W	PF08030
YGL161C	PF04893
YGL163C	PF00176
YGL163C	PF00271
YGL166W	PF00649
YGL167C	PF00122
YGL167C	PF00689
YGL167C	PF00690
YGL167C	PF00702
YGL171W	PF00270
YGL171W	PF00271
YGL172W	PF13634
YGL173C	PF03159
YGL178W	PF00806
YGL179C	PF00069
YGL180W	PF00069
YGL181W	PF00627
YGL181W	PF01412
YGL184C	PF01053
YGL185C	PF02826
YGL186C	PF02133
YGL189C	PF01283
YGL190C	PF00400
YGL192W	PF05063
YGL194C	PF00850
YGL196W	PF01168
YGL197W	PF13964
YGL198W	PF04893
YGL200C	PF01105
YGL201C	PF00493
YGL202W	PF00155
YGL203C	PF00450
YGL206C	PF00637
YGL207W	PF00557
YGL207W	PF08512
YGL208W	PF04739
YGL209W	PF13465
YGL210W	PF00071
YGL212W	PF00787
YGL212W	PF05739
YGL213C	PF00400
YGL215W	PF08613
YGL216W	PF00225
YGL220W	PF01722
YGL225W	PF08449
YGL226W	PF02936
YGL227W	PF00622
YGL227W	PF10607
YGL229C	PF04499
YGL234W	PF00586
YGL234W	PF02769
YGL238W	PF03810
YGL238W	PF08506
YGL241W	PF03810
YGL242C	PF00023
YGL245W	PF00749
YGL245W	PF03950
YGL246C	PF08652
YGL247W	PF10104
YGL251C	PF00270
YGL251C	PF00271
YGL251C	PF02889
YGL253W	PF00349
YGL253W	PF03727
YGL254W	PF00096
YGL255W	PF02535
YGL257C	PF11051
YGL258W	PF10339
YGL258W-A	PF00026
YGL259W	PF00026
YGL261C	PF00660
YGL263W	PF00674
YGR003W	PF00888
YGR003W	PF10557
YGR004W	PF06398
YGR007W	PF01467
YGR008C	PF04774
YGR010W	PF01467
YGR012W	PF00291
YGR015C	PF00561
YGR019W	PF00202
YGR023W	PF04478
YGR027C	PF03297
YGR027W-A	PF01021
YGR027W-B	PF00665
YGR027W-B	PF01021
YGR027W-B	PF07727
YGR028W	PF00004
YGR029W	PF04777
YGR031W	PF00561
YGR032W	PF02364
YGR032W	PF14288
YGR034W	PF00467
YGR036C	PF01569
YGR038C-A	PF01021
YGR038C-B	PF00665
YGR038C-B	PF01021
YGR038C-B	PF07727
YGR038W	PF04061
YGR040W	PF00069
YGR042W	PF10382
YGR043C	PF00923
YGR044C	PF13894
YGR052W	PF00069
YGR054W	PF08662
YGR055W	PF13520
YGR056W	PF00439
YGR056W	PF01426
YGR059W	PF00735
YGR060W	PF04116
YGR061C	PF00586
YGR061C	PF02769
YGR062C	PF02096
YGR065C	PF07690
YGR066C	PF09783
YGR067C	PF00096
YGR067C	PF13894
YGR068C	PF02752
YGR070W	PF00610
YGR070W	PF00621
YGR070W	PF00780
YGR074W	PF01423
YGR078C	PF02996
YGR080W	PF00241
YGR083C	PF01008
YGR085C	PF00281
YGR085C	PF00673
YGR086C	PF13805
YGR087C	PF00205
YGR087C	PF02775
YGR087C	PF02776
YGR088W	PF00199
YGR088W	PF06628
YGR091W	PF01798
YGR091W	PF08060
YGR092W	PF00069
YGR092W	PF00433
YGR094W	PF00133
YGR094W	PF08264
YGR095C	PF01138
YGR095C	PF03725
YGR096W	PF00153
YGR097W	PF00169
YGR100W	PF00566
YGR100W	PF02893
YGR101W	PF01694
YGR103W	PF00533
YGR108W	PF00134
YGR108W	PF02984
YGR109C	PF00134
YGR109C	PF02984
YGR109W-A	PF03732
YGR110W	PF00561
YGR117C	PF08513
YGR118W	PF00164
YGR119C	PF13634
YGR121C	PF00909
YGR123C	PF00149
YGR123C	PF00515
YGR123C	PF07719
YGR124W	PF00733
YGR124W	PF13537
YGR125W	PF00027
YGR125W	PF00916
YGR125W	PF01740
YGR131W	PF01284
YGR132C	PF01145
YGR133W	PF00179
YGR135W	PF00227
YGR135W	PF10584
YGR136W	PF00018
YGR138C	PF07690
YGR140W	PF12550
YGR143W	PF03935
YGR145W	PF08159
YGR148C	PF01246
YGR152C	PF00071
YGR154C	PF13409
YGR154C	PF13410
YGR155W	PF00291
YGR155W	PF00571
YGR157W	PF04191
YGR158C	PF01138
YGR159C	PF00076
YGR161C-C	PF01021
YGR161C-D	PF00665
YGR161C-D	PF01021
YGR161C-D	PF07727
YGR161W-A	PF01021
YGR161W-B	PF00665
YGR161W-B	PF01021
YGR161W-B	PF07727
YGR161W-B	PF13976
YGR162W	PF02854
YGR162W	PF12152
YGR163W	PF04670
YGR169C	PF00849
YGR170W	PF00168
YGR170W	PF02666
YGR171C	PF09334
YGR172C	PF04893
YGR173W	PF01926
YGR173W	PF02824
YGR177C	PF07247
YGR180C	PF00268
YGR181W	PF02953
YGR184C	PF02207
YGR185C	PF00579
YGR188C	PF00069
YGR188C	PF08171
YGR188C	PF08311
YGR189C	PF00722
YGR191W	PF00324
YGR192C	PF00044
YGR192C	PF02800
YGR193C	PF00364
YGR194C	PF00370
YGR194C	PF02782
YGR195W	PF01138
YGR195W	PF03725
YGR197C	PF12051
YGR199W	PF02366
YGR199W	PF02815
YGR200C	PF00400
YGR201C	PF00043
YGR202C	PF01467
YGR203W	PF00581
YGR204W	PF00763
YGR204W	PF01268
YGR204W	PF02882
YGR207C	PF01012
YGR208W	PF00702
YGR209C	PF00085
YGR210C	PF01926
YGR212W	PF07247
YGR213C	PF04479
YGR214W	PF00318
YGR218W	PF03810
YGR218W	PF08389
YGR220C	PF00297
YGR221C	PF08693
YGR224W	PF07690
YGR225W	PF00400
YGR230W	PF05032
YGR231C	PF01145
YGR232W	PF00023
YGR233C	PF00023
YGR233C	PF03105
YGR234W	PF00042
YGR234W	PF00175
YGR234W	PF00970
YGR238C	PF13418
YGR238C	PF13854
YGR240C	PF00365
YGR241C	PF07651
YGR243W	PF03650
YGR244C	PF00549
YGR246C	PF00382
YGR246C	PF08271
YGR248W	PF01182
YGR249W	PF00447
YGR250C	PF00076
YGR250C	PF14259
YGR252W	PF00439
YGR252W	PF00583
YGR253C	PF00227
YGR253C	PF10584
YGR254W	PF00113
YGR254W	PF03952
YGR255C	PF01494
YGR256W	PF00393
YGR256W	PF03446
YGR257C	PF00153
YGR258C	PF00752
YGR258C	PF00867
YGR260W	PF07690
YGR261C	PF01602
YGR264C	PF09334
YGR270W	PF00004
YGR270W	PF00439
YGR271W	PF00270
YGR271W	PF00271
[truncated: 2,936 more rows]
