# Supplementary material for: Method for Identifying Essential Proteins by Key Features of Proteins in a Novel Protein-Domain Network
Source: Front Genet. 2021 Jun 29;12:708162. doi: 10.3389/fgene.2021.708162 (PMC8276041; doi:10.3389/fgene.2021.708162)
Supplement: Supplementary file 6 [file Table_6.XLSX]

## Sheet: Sheet1
Q0050	6
Q0080	2
Q0085	33
Q0130	55
Q0250	29
Q0275	32
R0020C	0
R0030W	0
YAL001C	6
YAL002W	67
YAL003W	91
YAL004W	0
YAL005C	81
YAL007C	51
YAL009W	12
YAL010C	18
YAL011W	7
YAL012W	86
YAL013W	5
YAL014C	7
YAL015C	38
YAL016W	96
YAL017W	16
YAL018C	4
YAL019W	69
YAL021C	67
YAL022C	80
YAL023C	54
YAL024C	28
YAL025C	90
YAL026C	93
YAL027W	2
YAL028W	2
YAL029C	16
YAL030W	36
YAL031C	4
YAL032C	85
YAL033W	39
YAL034C	9
YAL034W-A	14
YAL035W	92
YAL036C	94
YAL038W	87
YAL040C	11
YAL041W	37
YAL042W	93
YAL043C	36
YAL045C	0
YAL047C	3
YAL048C	86
YAL049C	45
YAL051W	3
YAL053W	13
YAL054C	17
YAL055W	3
YAL056W	0
YAL058W	88
YAL059W	4
YAL060W	6
YAL061W	6
YAL062W	60
YAL063C-A	0
YAL064W	0
YAL064W-B	0
YAL066W	0
YAL067C	11
YAL069W	0
YAR002C-A	26
YAR002W	6
YAR003W	78
YAR007C	94
YAR008W	47
YAR014C	12
YAR018C	65
YAR019C	25
YAR023C	1
YAR027W	0
YAR028W	0
YAR030C	0
YAR031W	0
YAR033W	0
YAR035W	73
YAR042W	59
YAR047C	0
YAR064W	0
YAR066W	0
YAR068W	0
YAR069C	0
YAR071W	20
YAR073W	0
YBL001C	16
YBL002W	40
YBL003C	83
YBL004W	80
YBL005W	0
YBL005W-B	0
YBL006C	2
YBL007C	28
YBL008W	53
YBL009W	12
YBL010C	3
YBL013W	61
YBL014C	5
YBL015W	43
YBL016W	75
YBL017C	34
YBL018C	3
YBL019W	66
YBL020W	82
YBL021C	77
YBL022C	90
YBL023C	96
YBL024W	92
YBL025W	3
YBL026W	77
YBL027W	94
YBL029W	2
YBL030C	52
YBL031W	2
YBL032W	23
YBL033C	26
YBL034C	12
YBL035C	79
YBL036C	94
YBL037W	90
YBL038W	33
YBL039C	71
YBL040C	95
YBL041W	94
YBL042C	2
YBL043W	8
YBL044W	0
YBL045C	4
YBL046W	12
YBL047C	72
YBL049W	84
YBL050W	95
YBL051C	20
YBL052C	21
YBL053W	0
YBL054W	0
YBL056W	39
YBL058W	81
YBL059W	1
YBL061C	26
YBL063W	89
YBL064C	81
YBL065W	0
YBL066C	9
YBL067C	35
YBL068W	59
YBL071C	0
YBL072C	97
YBL074C	44
YBL075C	15
YBL076C	96
YBL078C	93
YBL079W	72
YBL080C	73
YBL081W	1
YBL082C	78
YBL084C	74
YBL085W	16
YBL086C	11
YBL088C	16
YBL089W	20
YBL090W	2
YBL091C	96
YBL092W	92
YBL093C	3
YBL094C	0
YBL095W	12
YBL097W	77
YBL098W	80
YBL099W	91
YBL100C	0
YBL100W-A	0
YBL101C	3
YBL102W	72
YBL103C	23
YBL104C	62
YBL105C	74
YBL106C	45
YBL107C	12
YBL108W	0
YBL112C	0
YBL113C	0
YBR001C	37
YBR003W	91
YBR004C	70
YBR006W	83
YBR007C	14
YBR008C	14
YBR010W	98
YBR011C	95
YBR012C	0
YBR012W-B	0
YBR013C	0
YBR014C	11
YBR015C	14
YBR017C	92
YBR018C	73
YBR019C	30
YBR020W	81
YBR021W	6
YBR023C	27
YBR024W	35
YBR025C	96
YBR027C	0
YBR028C	12
YBR029C	89
YBR033W	0
YBR034C	96
YBR035C	71
YBR036C	2
YBR037C	60
YBR038W	25
YBR039W	92
YBR040W	7
YBR041W	72
YBR042C	62
YBR043C	18
YBR044C	2
YBR045C	1
YBR047W	2
YBR049C	16
YBR050C	0
YBR052C	0
YBR053C	33
YBR054W	8
YBR055C	93
YBR056W	11
YBR057C	5
YBR058C	92
YBR058C-A	2
YBR059C	36
YBR060C	72
YBR061C	90
YBR063C	0
YBR064W	0
YBR065C	22
YBR066C	26
YBR067C	1
YBR068C	5
YBR069C	16
YBR070C	76
YBR072W	16
YBR073W	25
YBR074W	33
YBR076W	1
YBR077C	2
YBR078W	14
YBR079C	90
YBR080C	95
YBR081C	17
YBR082C	59
YBR083W	6
YBR084W	35
YBR085W	48
YBR086C	41
YBR087W	94
YBR088C	92
YBR089C-A	37
YBR089W	0
YBR090C	0
YBR091C	4
YBR093C	21
YBR094W	37
YBR095C	9
YBR096W	19
YBR097W	80
YBR098W	9
YBR099C	0
YBR101C	49
YBR102C	48
YBR103W	70
YBR105C	39
YBR106W	23
YBR107C	0
YBR108W	3
YBR109C	98
YBR109W-A	0
YBR110W	88
YBR111W-A	50
YBR112C	53
YBR113W	0
YBR114W	46
YBR115C	44
YBR116C	0
YBR117C	16
YBR118W	97
YBR119W	15
YBR120C	4
YBR121C	91
YBR122C	12
YBR123C	37
YBR124W	0
YBR125C	8
YBR126C	49
YBR127C	96
YBR128C	2
YBR129C	5
YBR130C	2
YBR131W	3
YBR132C	16
YBR133C	83
YBR134W	0
YBR135W	87
YBR136W	59
YBR137W	11
YBR138C	3
YBR139W	60
YBR140C	20
YBR141C	24
YBR142W	80
YBR143C	93
YBR144C	0
YBR145W	3
YBR146W	36
YBR149W	6
YBR150C	0
YBR152W	0
YBR154C	90
YBR155W	84
YBR156C	7
YBR157C	2
YBR158W	18
YBR159W	92
YBR160W	95
YBR161W	12
YBR162C	13
YBR162W-A	5
YBR163W	11
YBR166C	25
YBR167C	10
YBR168W	2
YBR169C	35
YBR170C	85
YBR171W	15
YBR172C	25
YBR173C	45
YBR174C	0
YBR175W	79
YBR176W	32
YBR177C	10
YBR178W	0
YBR179C	24
YBR180W	14
YBR182C	31
YBR183W	17
YBR184W	0
YBR185C	6
YBR186W	65
YBR187W	81
YBR188C	1
YBR190W	0
YBR192W	78
YBR193C	10
YBR194W	2
YBR195C	6
YBR196C	96
YBR197C	2
YBR198C	90
YBR199W	10
YBR200W	20
YBR201W	14
YBR202W	92
YBR203W	4
YBR204C	3
YBR205W	4
YBR207W	5
YBR208C	62
YBR209W	0
YBR211C	2
YBR212W	21
YBR213W	16
YBR214W	14
YBR215W	11
YBR216C	5
YBR217W	32
YBR218C	34
YBR219C	0
YBR220C	86
YBR221C	93
YBR222C	83
YBR223C	62
YBR225W	2
YBR226C	0
YBR227C	87
YBR228W	62
YBR229C	92
YBR230C	2
YBR231C	57
YBR233W	78
YBR234C	85
YBR235W	76
YBR236C	86
YBR237W	89
YBR238C	4
YBR239C	15
YBR240C	2
YBR241C	76
YBR242W	41
YBR243C	92
YBR244W	62
YBR245C	18
YBR246W	40
YBR247C	92
YBR248C	34
YBR249C	22
YBR250W	1
YBR251W	21
YBR252W	87
YBR253W	3
YBR254C	84
YBR255W	5
YBR257W	38
YBR258C	2
YBR260C	61
YBR261C	88
YBR262C	2
YBR263W	14
YBR264C	1
YBR265W	63
YBR266C	0
YBR267W	88
YBR269C	21
YBR270C	3
YBR271W	18
YBR272C	4
YBR273C	26
YBR274W	60
YBR275C	5
YBR276C	16
YBR277C	0
YBR278W	11
YBR279W	47
YBR280C	13
YBR281C	19
YBR282W	11
YBR283C	5
YBR284W	2
YBR285W	0
YBR286W	19
YBR287W	26
YBR288C	10
YBR289W	40
YBR290W	15
YBR291C	73
YBR293W	14
YBR295W	8
YBR296C	80
YBR298C	8
YBR299W	7
YBR300C	0
YBR301W	0
YBR302C	0
YCL004W	84
YCL005W	1
YCL007C	0
YCL008C	60
YCL009C	21
YCL010C	14
YCL011C	41
YCL014W	8
YCL016C	58
YCL017C	98
YCL018W	31
YCL019W	4
YCL020W	0
YCL023C	0
YCL024W	29
YCL025C	8
YCL026C-A	0
YCL027W	5
YCL028W	1
YCL029C	23
YCL030C	29
YCL031C	40
YCL032W	7
YCL033C	86
YCL034W	16
YCL035C	36
YCL036W	1
YCL037C	21
YCL038C	17
YCL039W	70
YCL040W	18
YCL042W	0
YCL043C	96
YCL044C	4
YCL045C	79
YCL046W	0
YCL048W	5
YCL049C	1
YCL050C	8
YCL051W	3
YCL052C	8
YCL054W	83
YCL055W	47
YCL056C	1
YCL057W	67
YCL058C	0
YCL059C	90
YCL061C	10
YCL063W	2
YCL064C	47
YCL065W	0
YCL069W	1
YCL073C	0
YCL076W	0
YCR001W	0
YCR002C	47
YCR003W	17
YCR004C	22
YCR005C	3
YCR007C	1
YCR008W	22
YCR009C	54
YCR010C	20
YCR011C	90
YCR012W	96
YCR014C	53
YCR015C	10
YCR016W	17
YCR020C-A	8
YCR021C	4
YCR022C	0
YCR023C	57
YCR024C	89
YCR024C-A	1
YCR027C	44
YCR028C	19
YCR028C-A	15
YCR030C	16
YCR033W	28
YCR034W	59
YCR035C	8
YCR036W	88
YCR037C	5
YCR038C	24
YCR039C	9
YCR040W	2
YCR041W	0
YCR042C	73
YCR044C	71
YCR045C	11
YCR046C	13
YCR047C	94
YCR048W	24
YCR050C	0
YCR052W	33
YCR053W	56
YCR054C	12
YCR057C	95
YCR059C	63
YCR060W	8
YCR061W	16
YCR063W	93
YCR065W	39
YCR066W	55
YCR067C	5
YCR068W	19
YCR071C	14
YCR072C	96
YCR073C	27
YCR075C	70
YCR076C	1
YCR077C	40
YCR079W	16
YCR081W	10
YCR082W	2
YCR084C	48
YCR086W	4
YCR087C-A	22
YCR087W	0
YCR088W	70
YCR091W	23
YCR092C	53
YCR093W	92
YCR094W	87
YCR095C	7
YCR096C	1
YCR097W	4
YCR098C	25
YCR099C	0
YCR100C	0
YCR101C	0
YCR105W	10
YCR106W	2
YCR107W	0
YDL001W	49
YDL002C	29
YDL003W	63
YDL004W	84
YDL005C	2
YDL006W	37
YDL007W	96
YDL008W	59
YDL011C	0
YDL012C	2
YDL013W	4
YDL014W	96
YDL015C	94
YDL016C	0
YDL017W	61
YDL019C	30
YDL020C	11
YDL022W	81
YDL023C	0
YDL024C	18
YDL025C	9
YDL026W	0
YDL027C	2
YDL028C	34
YDL029W	87
YDL030W	92
YDL031W	90
YDL035C	10
YDL036C	43
YDL037C	0
YDL040C	93
YDL041W	0
YDL042C	23
YDL043C	79
YDL044C	2
YDL045C	41
YDL045W-A	14
YDL046W	26
YDL047W	67
YDL049C	5
YDL050C	0
YDL051W	71
YDL052C	82
YDL053C	2
YDL054C	17
YDL055C	94
YDL056W	20
YDL058W	52
YDL059C	9
YDL060W	95
YDL061C	14
YDL062W	0
YDL063C	15
YDL064W	90
YDL065C	35
YDL066W	75
YDL067C	17
YDL069C	0
YDL070W	30
YDL071C	0
YDL072C	61
YDL073W	3
YDL074C	73
YDL075W	66
YDL076C	3
YDL077C	30
YDL078C	8
YDL079C	5
YDL080C	1
YDL081C	81
YDL082W	58
YDL084W	94
YDL085W	7
YDL086W	17
YDL087C	88
YDL088C	5
YDL089W	3
YDL090C	88
YDL091C	76
YDL092W	6
YDL093W	1
YDL094C	0
YDL095W	21
YDL096C	0
YDL097C	97
YDL098C	79
YDL099W	2
YDL100C	94
YDL101C	38
YDL102W	92
YDL103C	94
YDL104C	80
YDL105W	41
YDL106C	32
YDL108W	80
YDL110C	3
YDL111C	27
YDL112W	15
YDL113C	17
YDL114W	76
YDL115C	7
YDL116W	56
YDL117W	21
YDL118W	0
YDL119C	57
YDL121C	2
YDL123W	11
YDL124W	15
YDL125C	95
YDL126C	96
YDL127W	12
YDL128W	35
YDL129W	2
YDL130W	14
YDL131W	52
YDL132W	94
YDL133W	9
YDL134C	34
YDL135C	84
YDL137W	83
YDL138W	20
YDL139C	2
YDL140C	91
YDL143W	97
YDL144C	17
YDL145C	94
YDL146W	15
YDL147W	97
YDL148C	81
YDL149W	57
YDL150W	51
YDL153C	66
YDL154W	47
YDL155W	44
YDL156W	52
YDL157C	5
YDL158C	0
YDL159W	53
YDL159W-A	0
YDL160C	93
YDL161W	21
YDL162C	0
YDL164C	93
YDL165W	18
YDL166C	91
YDL167C	14
YDL168W	84
YDL171C	62
YDL172C	0
YDL173W	3
YDL175C	8
YDL176W	2
YDL178W	84
YDL179W	2
YDL180W	2
YDL181W	11
YDL183C	15
YDL185W	17
YDL186W	2
YDL188C	71
YDL189W	24
YDL190C	91
YDL191W	97
YDL192W	43
YDL193W	53
YDL195W	95
YDL196W	0
YDL198C	23
YDL199C	2
YDL200C	19
YDL201W	91
YDL202W	12
YDL203C	7
YDL204W	2
YDL206W	72
YDL207W	52
YDL208W	90
YDL209C	29
YDL210W	39
YDL211C	0
YDL212W	16
YDL213C	21
YDL214C	7
YDL215C	29
YDL216C	16
YDL217C	77
YDL218W	3
YDL219W	85
YDL220C	2
YDL221W	0
YDL223C	0
YDL224C	21
YDL225W	4
YDL226C	81
YDL229W	5
YDL230W	81
YDL231C	11
YDL232W	1
YDL233W	6
YDL235C	10
YDL236W	88
YDL237W	12
YDL238C	75
YDL239C	1
YDL240W	25
YDL241W	0
YDL243C	6
YDL245C	0
YDL246C	21
YDL248W	0
YDR001C	52
YDR002W	76
YDR003W	4
YDR004W	52
YDR005C	48
YDR006C	43
YDR007W	17
YDR009W	8
YDR010C	0
YDR012W	95
YDR013W	76
YDR016C	10
YDR017C	49
YDR018C	36
YDR020C	41
YDR021W	75
YDR022C	1
YDR023W	95
YDR024W	0
YDR026C	22
YDR027C	40
YDR028C	13
YDR030C	8
YDR031W	9
YDR032C	15
YDR034C	6
YDR036C	87
YDR037W	99
YDR038C	13
YDR039C	16
YDR040C	4
YDR041W	20
YDR042C	0
YDR043C	27
YDR044W	83
YDR045C	84
YDR046C	1
YDR049W	65
YDR050C	96
YDR051C	13
YDR052C	17
YDR054C	65
YDR055W	1
YDR056C	3
YDR060W	85
YDR061W	19
YDR062W	91
YDR063W	37
YDR066C	4
YDR067C	10
YDR068W	20
YDR069C	23
YDR070C	2
YDR071C	35
YDR072C	6
YDR073W	2
YDR074W	31
YDR075W	32
YDR076W	2
YDR077W	5
YDR078C	2
YDR079C-A	48
YDR079W	13
YDR080W	76
YDR081C	20
YDR082W	3
YDR084C	82
YDR085C	4
YDR086C	82
YDR087C	50
YDR088C	62
YDR091C	88
YDR092W	94
YDR093W	15
YDR095C	0
YDR096W	23
YDR097C	92
YDR098C	27
YDR099W	73
YDR100W	13
YDR101C	20
YDR102C	0
YDR103W	4
YDR104C	10
YDR105C	86
YDR106W	3
YDR107C	11
YDR108W	11
YDR110W	5
YDR111C	45
YDR113C	2
YDR115W	17
YDR116C	30
YDR118W	2
YDR119W	1
YDR120C	96
YDR121W	24
YDR122W	28
YDR123C	2
YDR126W	20
YDR127W	22
YDR128W	62
YDR129C	81
YDR130C	2
YDR131C	4
YDR132C	9
YDR133C	0
YDR135C	93
YDR136C	0
YDR137W	12
YDR138W	2
YDR139C	16
YDR140W	88
YDR141C	63
YDR142C	71
YDR143C	25
YDR144C	2
YDR145W	22
YDR146C	20
YDR148C	89
YDR150W	9
YDR151C	7
YDR152W	73
YDR155C	96
YDR156W	2
YDR158W	33
YDR159W	36
YDR160W	5
YDR162C	16
YDR164C	91
YDR165W	32
YDR166C	47
YDR167W	65
YDR168W	63
YDR169C	9
YDR170C	85
YDR170W-A	0
YDR171W	6
YDR172W	96
YDR173C	55
YDR174W	20
YDR175C	11
YDR176W	19
YDR177W	84
YDR178W	5
YDR179C	2
YDR180W	50
YDR181C	2
YDR183W	87
YDR184C	3
YDR186C	2
YDR188W	98
YDR189W	96
YDR190C	95
YDR192C	9
YDR194C	13
YDR195W	2
YDR196C	87
YDR198C	28
YDR200C	20
YDR201W	5
YDR202C	5
YDR205W	23
YDR206W	19
YDR207C	2
YDR208W	67
YDR211W	92
YDR212W	93
YDR213W	10
YDR214W	84
YDR215C	0
YDR216W	5
YDR217C	11
YDR218C	2
YDR219C	2
YDR221W	73
YDR223W	1
YDR224C	92
YDR225W	74
YDR226W	97
YDR227W	1
YDR228C	45
YDR229W	10
YDR231C	9
YDR233C	35
YDR235W	27
YDR236C	75
YDR237W	27
YDR238C	96
YDR239C	2
YDR240C	2
YDR242W	70
YDR243C	83
YDR244W	68
YDR245W	15
YDR246W	77
YDR247W	12
YDR249C	2
YDR250C	0
YDR251W	0
YDR252W	0
YDR253C	21
YDR254W	12
YDR255C	75
YDR256C	78
YDR259C	3
YDR260C	1
YDR261W-A	0
YDR261W-B	1
YDR262W	7
YDR263C	33
YDR264C	75
YDR265W	75
YDR266C	73
YDR267C	93
YDR268W	79
YDR269C	0
YDR270W	92
YDR271C	0
YDR273W	0
YDR274C	0
YDR275W	0
YDR276C	31
YDR277C	4
YDR279W	3
YDR280W	92
YDR281C	0
YDR283C	70
YDR284C	84
YDR285W	5
YDR286C	11
YDR287W	64
YDR288W	8
YDR289C	50
YDR290W	0
YDR291W	34
YDR292C	94
YDR293C	22
YDR295C	4
YDR296W	5
YDR297W	30
YDR298C	88
YDR299W	76
YDR300C	28
YDR301W	83
YDR303C	1
YDR304C	56
YDR305C	35
YDR306C	9
YDR307W	2
YDR308C	29
YDR309C	2
YDR310C	1
YDR311W	60
YDR312W	54
YDR313C	16
YDR314C	3
YDR315C	7
YDR316W	10
YDR317W	2
YDR318W	4
YDR319C	12
YDR320C	27
YDR321W	18
YDR322C-A	13
YDR322W	19
YDR323C	62
YDR324C	75
YDR326C	19
YDR327W	0
YDR328C	94
YDR329C	44
YDR330W	57
YDR331W	94
YDR332W	25
YDR333C	67
YDR334W	64
YDR335W	55
YDR337W	25
YDR339C	93
YDR340W	0
YDR341C	79
YDR342C	7
YDR343C	9
YDR344C	0
YDR345C	13
YDR346C	19
YDR347W	6
YDR348C	13
YDR349C	5
YDR350C	2
YDR351W	1
YDR353W	35
YDR356W	29
YDR357C	4
YDR359C	16
YDR361C	57
YDR362C	12
YDR363W	6
YDR363W-A	6
YDR364C	94
YDR365C	88
YDR366C	0
YDR367W	11
YDR368W	24
YDR369C	2
YDR370C	2
YDR371W	78
YDR372C	70
YDR373W	78
YDR374C	37
YDR376W	86
YDR377W	17
YDR378C	72
YDR379W	36
YDR380W	4
YDR381W	65
YDR382W	85
YDR383C	1
YDR384C	2
YDR386W	71
YDR387C	19
YDR388W	53
YDR389W	45
YDR390C	89
YDR392W	44
YDR394W	92
YDR395W	5
YDR397C	80
YDR398W	60
YDR399W	6
YDR400W	69
YDR403W	7
YDR404C	91
YDR405W	13
YDR406W	15
YDR407C	49
YDR408C	29
YDR409W	32
YDR410C	88
YDR412W	21
YDR413C	0
YDR414C	23
YDR415C	21
YDR416W	85
YDR419W	76
YDR421W	14
YDR422C	3
YDR423C	1
YDR424C	95
YDR425W	13
YDR427W	93
YDR428C	17
YDR429C	83
YDR430C	81
YDR431W	0
YDR432W	59
YDR433W	0
YDR435C	88
YDR436W	16
YDR438W	12
YDR439W	1
YDR440W	23
YDR441C	0
YDR442W	0
YDR443C	10
YDR444W	5
YDR445C	0
YDR446W	3
YDR448W	87
YDR449C	29
YDR450W	91
YDR452W	76
YDR453C	5
YDR454C	93
YDR455C	0
YDR456W	94
YDR457W	55
YDR459C	11
YDR460W	79
YDR461W	0
YDR462W	9
YDR463W	5
YDR464W	4
YDR465C	27
YDR466W	33
YDR468C	23
YDR469W	11
YDR472W	62
YDR473C	78
YDR475C	4
YDR477W	87
YDR478W	3
YDR479C	15
YDR480W	0
YDR482C	10
YDR483W	4
YDR484W	82
YDR485C	56
YDR487C	28
YDR488C	43
YDR489W	78
YDR490C	10
YDR492W	20
YDR496C	90
YDR497C	30
YDR498C	9
YDR499W	4
YDR500C	13
YDR501W	9
YDR502C	35
YDR503C	16
YDR504C	0
YDR505C	13
YDR506C	4
YDR507C	33
YDR508C	6
YDR509W	0
YDR510W	95
YDR511W	61
YDR512C	2
YDR513W	66
YDR514C	5
YDR515W	8
YDR516C	1
YDR517W	30
YDR520C	5
YDR522C	1
YDR523C	82
YDR524C	2
YDR526C	0
YDR527W	14
YDR528W	0
YDR529C	71
YDR530C	17
YDR531W	79
YDR532C	2
YDR533C	25
YDR534C	1
YDR536W	16
YDR538W	5
YDR541C	25
YDR542W	0
YDR545W	0
YEL002C	89
YEL003W	91
YEL004W	67
YEL005C	2
YEL006W	14
YEL008W	0
YEL009C	33
YEL011W	86
YEL012W	87
YEL013W	66
YEL015W	20
YEL016C	2
YEL017C-A	0
YEL017W	2
YEL018W	1
YEL019C	12
YEL020C	69
YEL020W-A	79
YEL021W	71
YEL022W	49
YEL023C	14
YEL024W	81
YEL026W	91
YEL027W	85
YEL030W	0
YEL031W	92
YEL032W	91
YEL034W	62
YEL036C	17
YEL037C	94
YEL038W	59
YEL039C	29
YEL041W	39
YEL042W	73
YEL043W	8
YEL046C	74
YEL047C	24
YEL048C	2
YEL049W	0
YEL050C	56
YEL051W	98
YEL053C	63
YEL054C	95
YEL055C	49
YEL056W	94
YEL057C	0
YEL058W	90
YEL059W	0
YEL060C	36
YEL061C	59
YEL062W	62
YEL063C	20
YEL064C	68
YEL065W	9
YEL066W	5
YEL068C	0
YEL069C	3
YEL070W	8
YEL071W	1
YEL072W	2
YEL074W	0
YEL075C	0
YEL077C	0
YER001W	3
YER002W	21
YER003C	94
YER004W	54
YER005W	58
YER006W	84
YER007C-A	89
YER007W	80
YER008C	22
YER009W	91
YER010C	19
YER011W	1
YER012W	92
YER013W	87
YER014W	66
YER015W	89
YER016W	91
YER017C	27
YER018C	1
YER019C-A	36
YER019W	50
YER020W	23
YER021W	93
YER022W	11
YER023W	93
YER025W	89
YER026C	16
YER027C	33
YER028C	31
YER029C	53
YER030W	5
YER031C	70
YER032W	2
YER033C	2
YER035W	0
YER036C	87
YER037W	5
YER038C	2
YER040W	22
YER041W	23
YER043C	96
YER044C	49
YER045C	19
YER047C	49
YER048C	35
YER049W	62
YER051W	31
YER052C	33
YER053C	85
YER054C	22
YER055C	31
YER056C	12
YER057C	70
YER058W	22
YER059W	15
YER060W-A	2
YER061C	86
YER062C	7
YER063W	9
YER064C	1
YER065C	31
YER066C-A	0
YER066W	3
YER067W	2
YER068W	59
YER069W	30
YER070W	75
YER071C	5
YER073W	35
YER075C	34
YER076C	0
YER077C	4
YER078C	78
YER079W	1
YER081W	68
YER082C	94
YER083C	5
YER084W	0
YER086W	46
YER087C-B	24
YER087W	58
YER088C	6
YER089C	62
YER090W	30
YER091C	31
YER092W	2
YER093C	63
YER094C	96
YER095W	86
YER096W	2
YER098W	53
YER099C	16
YER100W	88
YER101C	9
YER103W	15
YER104W	2
YER105C	4
YER106W	1
YER107C	96
YER109C	13
YER110C	70
YER111C	8
YER112W	78
YER113C	4
YER114C	22
YER115C	0
YER116C	14
YER117W	93
YER118C	16
YER119C	35
YER120W	59
YER121W	0
YER122C	81
YER123W	2
YER124C	5
YER125W	79
YER126C	94
YER127W	50
YER128W	14
YER129W	28
YER131W	84
YER132C	3
YER133W	98
YER136W	98
YER137C	3
YER138C	1
YER139C	12
YER140W	66
YER142C	25
YER143W	57
YER144C	22
YER145C	20
YER146W	84
YER147C	2
YER148W	97
YER149C	3
YER150W	3
YER151C	55
YER152C	40
YER153C	2
YER154W	85
YER155C	11
YER156C	93
YER157W	77
YER158C	2
YER159C	23
YER159C-A	0
YER160C	1
YER161C	5
YER162C	74
YER163C	85
YER164W	88
YER165W	96
YER166W	37
YER167W	2
YER168C	71
YER169W	16
YER170W	59
YER171W	93
YER172C	84
YER173W	49
YER174C	67
YER175C	28
YER176W	29
YER177W	33
YER178W	93
YER179W	46
YER180C	1
YER181C	0
YER182W	14
YER183C	71
YER184C	2
YER186C	0
YER188W	0
YER189W	0
YFL001W	81
YFL002C	88
YFL002W-B	0
YFL003C	61
YFL004W	11
YFL005W	74
YFL007W	63
YFL008W	88
YFL009W	51
YFL010C	12
YFL010W-A	0
YFL011W	7
YFL012W	0
YFL013C	12
YFL014W	12
YFL015C	0
YFL016C	86
YFL017C	82
YFL017W-A	82
YFL018C	93
YFL020C	0
YFL021W	12
YFL022C	91
YFL023W	8
YFL024C	55
YFL025C	57
YFL026W	10
YFL027C	32
YFL028C	47
YFL029C	11
YFL030W	82
YFL031W	5
YFL033C	26
YFL034C-B	15
YFL034W	38
YFL036W	78
YFL037W	97
YFL038C	98
YFL039C	98
YFL040W	4
YFL041W	28
YFL042C	49
YFL044C	76
YFL045C	91
YFL047W	31
YFL048C	16
YFL049W	4
YFL050C	4
YFL051C	0
YFL052W	1
YFL053W	54
YFL054C	8
YFL055W	51
YFL056C	2
YFL058W	4
YFL059W	16
YFL060C	5
YFL061W	7
YFL062W	0
YFL063W	0
YFL065C	0
YFL066C	0
YFL067W	1
YFR001W	10
YFR002W	81
YFR003C	36
YFR004W	98
YFR006W	81
YFR007W	28
YFR008W	2
YFR009W	88
YFR010W	93
YFR011C	8
YFR012W	0
YFR013W	4
YFR014C	66
YFR015C	72
YFR016C	4
YFR017C	1
YFR018C	65
YFR019W	74
YFR021W	70
YFR022W	5
YFR024C-A	21
YFR026C	0
YFR027W	44
YFR028C	85
YFR029W	5
YFR030W	29
YFR031C	89
YFR032C	5
YFR033C	17
YFR034C	5
YFR036W	1
YFR037C	38
YFR038W	47
YFR039C	1
YFR040W	7
YFR042W	3
YFR043C	4
YFR044C	80
YFR045W	5
YFR046C	1
YFR047C	49
YFR049W	5
YFR050C	94
YFR051C	93
YFR052W	86
YFR053C	65
YFR054C	0
YFR055W	5
YFR057W	0
YGL001C	92
YGL003C	93
YGL004C	27
YGL005C	4
YGL006W	89
YGL008C	21
YGL009C	26
YGL010W	27
YGL011C	93
YGL012W	24
YGL013C	4
YGL014W	27
YGL015C	0
YGL016W	13
YGL017W	64
YGL018C	66
YGL019W	25
YGL020C	9
YGL021W	10
YGL022W	93
YGL023C	17
YGL024W	0
YGL025C	1
YGL026C	35
YGL027C	80
YGL028C	8
YGL029W	9
YGL030W	91
YGL032C	2
YGL035C	37
YGL036W	2
YGL037C	65
YGL038C	12
YGL039W	5
YGL040C	80
YGL042C	0
YGL043W	89
YGL044C	69
YGL045W	21
YGL047W	74
YGL048C	95
YGL049C	32
YGL050W	42
YGL051W	0
YGL052W	0
YGL053W	0
YGL054C	83
YGL055W	76
YGL057C	0
YGL058W	95
YGL059W	62
YGL060W	4
YGL061C	2
YGL062W	55
YGL063W	23
YGL064C	14
YGL065C	89
YGL066W	29
YGL068W	89
YGL069C	0
YGL070C	85
YGL071W	3
YGL072C	0
YGL073W	45
YGL074C	0
YGL075C	2
YGL077C	15
YGL078C	28
YGL079W	5
YGL081W	0
YGL083W	73
YGL084C	46
YGL085W	19
YGL086W	27
YGL087C	91
YGL090W	1
YGL091C	94
YGL092W	46
YGL093W	15
YGL094C	74
YGL095C	91
YGL096W	11
YGL097W	93
YGL098W	13
YGL099W	90
YGL100W	71
YGL102C	0
YGL104C	4
YGL105W	53
YGL106W	17
YGL110C	10
YGL111W	54
YGL112C	83
YGL113W	3
YGL114W	23
YGL115W	75
YGL116W	22
YGL117W	1
YGL119W	85
YGL120C	89
YGL121C	1
YGL122C	41
YGL124C	78
YGL125W	64
YGL126W	9
YGL127C	24
YGL128C	4
YGL129C	21
YGL130W	61
YGL131C	17
YGL132W	0
YGL133W	46
YGL134W	4
YGL137W	93
YGL138C	3
YGL139W	4
YGL141W	63
YGL142C	80
YGL143C	89
YGL144C	18
YGL145W	8
YGL146C	1
YGL147C	35
YGL148W	36
YGL149W	0
YGL150C	64
YGL151W	3
YGL153W	57
YGL154C	26
YGL155W	23
YGL156W	44
YGL157W	18
YGL158W	0
YGL161C	65
YGL162W	3
YGL163C	91
YGL165C	0
YGL166W	4
YGL167C	97
YGL168W	0
YGL169W	51
YGL170C	0
YGL171W	87
YGL172W	22
YGL173C	70
YGL174W	57
YGL175C	4
YGL177W	0
YGL178W	13
YGL179C	65
YGL180W	66
YGL181W	26
YGL183C	69
YGL184C	19
YGL185C	3
YGL186C	9
YGL187C	49
YGL189C	61
YGL190C	88
YGL192W	25
YGL194C	13
YGL195W	72
YGL197W	7
YGL198W	43
YGL200C	78
YGL201C	96
YGL202W	56
YGL204C	0
YGL205W	85
YGL206C	96
YGL207W	93
YGL208W	57
YGL210W	35
YGL212W	19
YGL213C	13
YGL214W	0
YGL215W	17
YGL216W	73
YGL217C	0
YGL220W	62
YGL221C	62
YGL222C	2
YGL223C	3
YGL225W	80
YGL226C-A	2
YGL226W	2
YGL227W	23
YGL229C	1
YGL230C	0
YGL233W	72
YGL234W	81
YGL235W	0
YGL236C	79
YGL237C	24
YGL238W	96
YGL239C	0
YGL240W	80
YGL241W	69
YGL242C	48
YGL244W	71
YGL245W	50
YGL246C	69
YGL247W	5
YGL249W	2
YGL250W	3
YGL251C	44
YGL252C	14
YGL253W	25
YGL254W	34
YGL256W	74
YGL258W	0
YGL259W	0
YGL263W	0
YGR002C	80
YGR003W	69
YGR004W	4
YGR005C	70
YGR006W	60
YGR009C	14
YGR010W	53
YGR013W	8
YGR014W	7
YGR016W	3
YGR017W	18
YGR018C	0
YGR020C	93
YGR021W	65
YGR023W	1
YGR024C	77
YGR026W	4
YGR028W	83
YGR029W	77
YGR030C	2
YGR031W	82
YGR032W	17
YGR033C	43
YGR034W	88
YGR035C	0
YGR036C	71
YGR037C	87
YGR038W	61
YGR040W	13
YGR041W	0
YGR042W	4
YGR045C	0
YGR046W	78
YGR047C	81
YGR048W	87
YGR049W	1
YGR050C	0
YGR052W	6
YGR053C	9
YGR054W	87
YGR055W	78
YGR056W	20
YGR057C	12
YGR058W	45
YGR059W	3
YGR060W	79
YGR061C	74
YGR062C	50
YGR063C	85
YGR064W	0
YGR065C	3
YGR066C	29
YGR067C	2
YGR068C	3
YGR069W	0
YGR070W	2
YGR071C	2
YGR072W	9
YGR073C	0
YGR074W	89
YGR075C	2
YGR076C	11
YGR077C	2
YGR078C	89
YGR079W	2
YGR080W	77
YGR081C	4
YGR082W	61
YGR083C	84
YGR084C	2
YGR085C	92
YGR086C	14
YGR087C	7
YGR088W	9
YGR089W	11
YGR090W	86
YGR091W	86
YGR092W	7
YGR094W	97
YGR095C	65
YGR097W	5
YGR098C	16
YGR099W	13
YGR100W	43
YGR101W	72
YGR102C	3
YGR103W	91
YGR104C	7
YGR105W	12
YGR107W	0
YGR108W	17
YGR109C	6
YGR110W	20
YGR111W	13
YGR113W	10
YGR114C	0
YGR115C	0
YGR116W	88
YGR117C	4
YGR119C	64
YGR120C	2
YGR121C	14
YGR122W	2
YGR123C	84
YGR124W	47
YGR125W	23
YGR126W	2
YGR128C	5
YGR129W	4
YGR130C	2
YGR131W	1
YGR132C	92
YGR133W	18
YGR134W	4
YGR135W	94
YGR136W	14
YGR138C	10
YGR139W	0
YGR140W	2
YGR141W	17
YGR142W	2
YGR143W	4
YGR144W	23
YGR145W	93
YGR146C	0
YGR148C	43
YGR149W	30
YGR150C	7
YGR151C	0
YGR152C	53
YGR153W	0
YGR154C	0
YGR155W	88
YGR156W	4
YGR157W	20
YGR158C	12
YGR159C	81
YGR160W	0
YGR161C	1
YGR161C-D	0
YGR161W-B	5
YGR162W	45
YGR163W	81
YGR165W	8
YGR166W	4
YGR167W	23
YGR168C	1
YGR169C	6
YGR170W	19
YGR171C	92
YGR172C	94
YGR173W	76
YGR174C	5
YGR175C	54
YGR177C	4
YGR178C	65
YGR179C	2
YGR180C	1
YGR181W	65
YGR182C	0
YGR184C	64
YGR185C	85
YGR186W	20
YGR187C	74
YGR188C	53
YGR189C	17
YGR191W	29
YGR192C	50
YGR193C	16
YGR194C	77
YGR195W	97
YGR196C	3
YGR197C	12
YGR198W	6
YGR199W	3
YGR200C	84
YGR201C	3
YGR202C	56
YGR203W	24
YGR204W	54
YGR205W	30
YGR206W	1
YGR207C	85
YGR208W	74
YGR209C	65
YGR210C	23
YGR211W	93
YGR213C	8
YGR214W	60
YGR215W	19
YGR216C	35
YGR217W	82
[truncated: 3,093 more rows]
